# Supplementary material for: Extraction of High-Quality RNA from S. aureus Internalized by Endothelial Cells
Source: MDPI journal article supplement (doi:10.3390/microorganisms11041020), 2023-04-13
Supplement: s1 [file s1]

# Supplement to “Extraction of High-Quality RNA from *S. aureus* Internalized by Endothelial Cells”

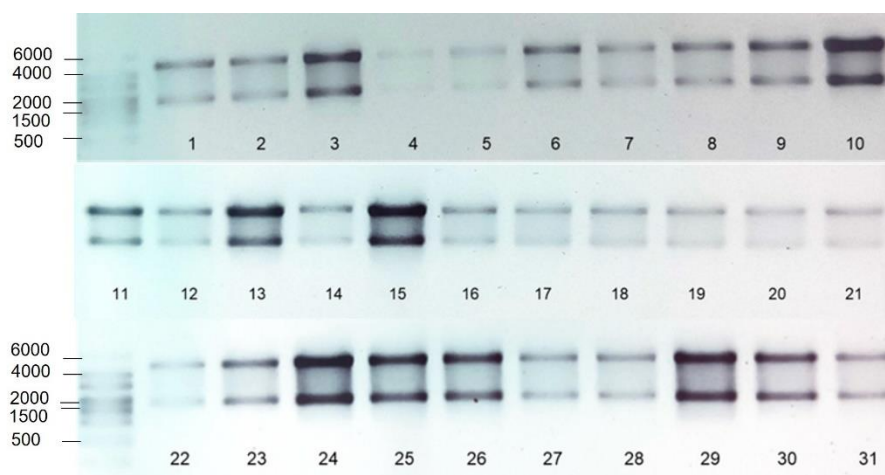

**Supplementary Figure S1.** Gel electrophoresis of endothelial RNA samples. RNA ladder in bp. Numbers refer to Supp. Table S1.

**Supplementary Table S1:** List of endothelial RNA control and infected samples. Numbers refer to Supp. Figure S1.

| Control samples              | <i>S. aureus</i> infected samples |
|------------------------------|-----------------------------------|
| 1 Non-infected 90 min p.i._1 | 16 Infected 90 min p.i._1         |
| 2 Non-infected 90 min p.i._2 | 17 Infected 90 min p.i._2         |
| 3 Non-infected 90 min p.i._3 | 18 Infected 90 min p.i._3         |
| 4 Non-infected 90 min p.i._4 | 19 Infected 90 min p.i._4         |
| 5 Non-infected 90 min p.i._5 | 20 Infected 90 min p.i._5         |
| 6 Non-infected 24 h p.i._1   | 21 Infected 90 min p.i._6         |
| 7 Non-infected 24 h p.i._2   | 22 Infected 24 h p.i._1           |
| 8 Non-infected 24 h p.i._3   | 23 Infected 24 h p.i._2           |
| 9 Non-infected 24 h p.i._4   | 24 Infected 24 h p.i._3           |
| 10 Non-infected 24 h p.i._5  | 25 Infected 24 h p.i._4           |
| 11 Non-infected 48 h p.i._1  | 26 Infected 24 h p.i._5           |
| 12 Non-infected 48 h p.i._2  | 27 Infected 48 h p.i._1           |
| 13 Non-infected 48 h p.i._3  | 28 Infected 48 h p.i._2           |
| 14 Non-infected 48 h p.i._4  | 29 Infected 48 h p.i._3           |
| 15 Non-infected 48 h p.i._5  | 30 Infected 48 h p.i._4           |
|                              | 31 Infected 48 h p.i._5           |

**Supplementary Table S2:** Overview of primers used in the study.

| <b>Endothelial primers (5'-3')</b> | <b>Forward</b>            | <b>Reverse</b>          | <b>Product size [bp]</b> | <b>Reference</b>           | <b>Final concentration [nM]</b> |
|------------------------------------|---------------------------|-------------------------|--------------------------|----------------------------|---------------------------------|
| <i>GAPDH</i>                       | GCAAATTTCCATGGCACCGT      | GCCCCACTTGATTTTGGAGG    | 104                      | Tuscherr et al., 2011 [28] | 67                              |
| <i>ACTB</i>                        | AACTGGAACGGTGAAGGTG       | CTGTGTGGACTTGGGAGAGG    | 209                      | Tuscherr et al., 2011 [28] | 67                              |
| <i>ICAM1</i>                       | ACCTCCCCACCCACATACATTT    | GGCATAGCTTGGGCATATTCC   | 96                       | Tuscherr et al., 2011 [28] | 100                             |
| <b>Bacterial primers (5'-3')</b>   | <b>Forward</b>            | <b>Reverse</b>          | <b>Product size [bp]</b> | <b>Reference</b>           | <b>Final concentration [nM]</b> |
| <i>gyrB</i>                        | AATTGAAGCAGGCTATGTGT      | ATAGACCATTTTGGTGTGG     | 122                      | Tuscherr et al., 2011 [28] | 200                             |
| <i>tmRNA</i>                       | CACTCTGCATCGCCTAACAG      | TCAAACGGCAGTGTTTAGCA    | 136                      | Bordeau et al., 2016 [32]  | 200                             |
| <i>aroE</i>                        | CTATCCACTTGCCATCTTTTAT    | ATGGCTTTAATATCACAATTCC  | 83                       | Tuscherr et al., 2011 [28] | 200                             |
| <i>gmk</i>                         | AAGGTGCAAAGCAAGTTAGAA     | CTTTACGCGCTTCGTTAATAC   | 150                      | Tuscherr et al., 2011 [28] | 200                             |
| <i>hu</i>                          | CCTCAAAGTTACCGAAACCAA     | AGCTGGTTCAGCAGTAGATGC   | 95                       | Buvelot et al., 2021 [33]  | 200                             |
| <i>agrA</i>                        | AACTGCACATACACGCTTACA     | GGCAATGAGTCTGTGAGATTT   | 155                      | Tuscherr et al., 2011 [28] | 200                             |
| <i>eap</i>                         | TGCATATGGAACATGGACTTTAGAA | AAGCGTCTGCCGCAGCTA      | 83                       | Tuscherr et al., 2011 [28] | 200                             |
| <i>fnbA</i>                        | ACAAGTTGAAGTGGCACAGCC     | CCGCTACATCTGCTGATCTTGTC | 74                       | Vaudaux et al., 2002 [34]  | 125                             |

**Supplementary Table S3:** Ranking of *S. aureus* housekeeping genes according to their transcript length and summary of ranking in different conditions.

| Ranking | Housekeeping gene | Transcript length [bp] | Condition I: <i>S. aureus</i> from culture | Condition II: intracellular <i>S. aureus</i> | Across both conditions |
|---------|-------------------|------------------------|--------------------------------------------|----------------------------------------------|------------------------|
| 1       | <i>gyrB</i>       | 1935                   | 4                                          | 1                                            | 1                      |
| 2       | <i>aroE</i>       | 802                    | 5                                          | 5                                            | 4                      |
| 3       | <i>gmk</i>        | 624                    | 1                                          | 4                                            | 3                      |
| 4       | <i>tmRNA</i>      | 362                    | 2                                          | 3                                            | 1                      |
| 5       | <i>hu</i>         | 273                    | 3                                          | 2                                            | 2                      |
